# Supplementary material
Source: HighWire-hosted journal article supplement (https://www.cmajopen.ca/highwire/filestream/87804/field_highwire_adjunct_files/0/2021-0031-1-at.pdf)
Supplement: 2021-0031-1-at.pdf [file 2021-0031-1-at.pdf]

## Appendix 1: Supplemental material

**Supplemental Figure S1.** Top 30 covariates from random forests using the mean decrease in accuracy method.

Legend: The mean decrease in accuracy is a measure of by how much removing a variable decreases the accuracy of prediction, as well as by how much including a variable would increase predictive accuracy.

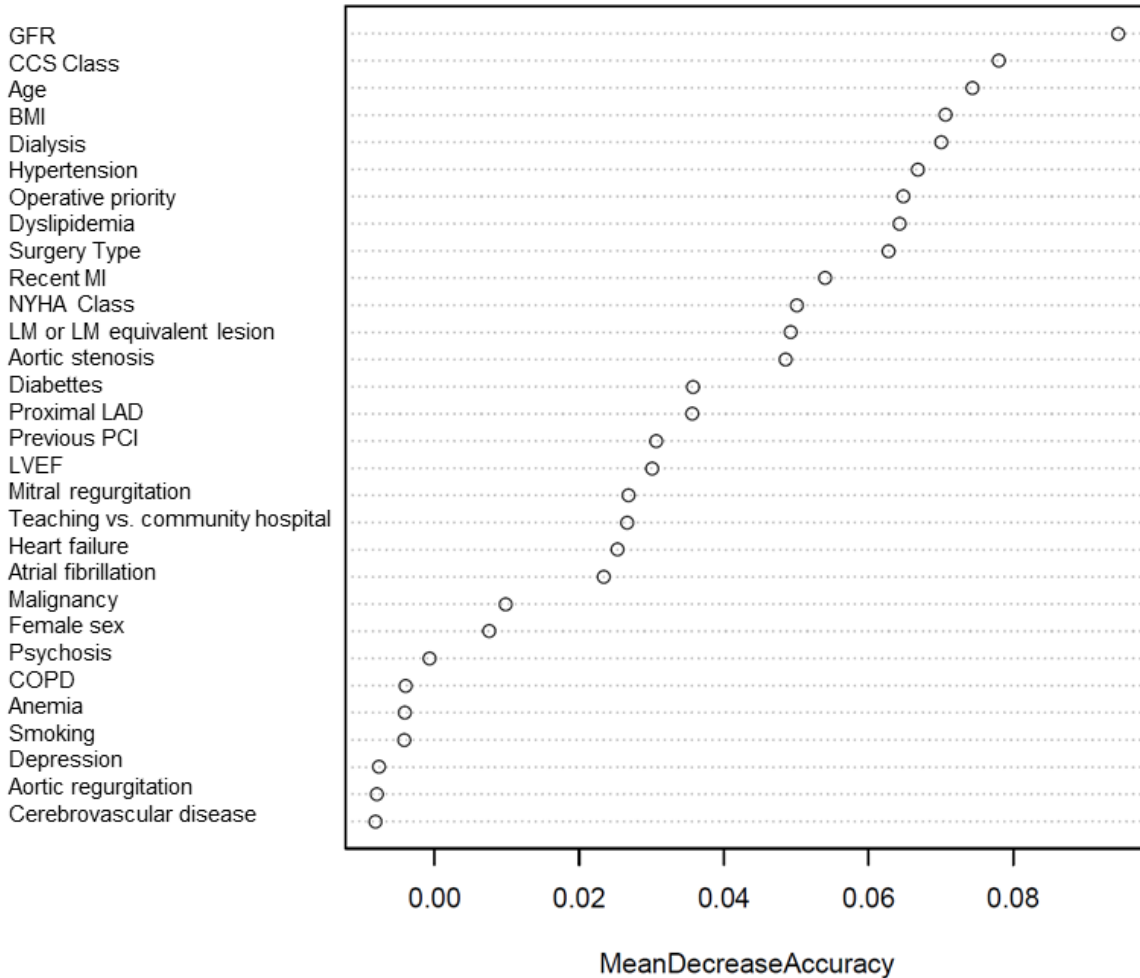

**Supplemental Figure S2a.** Calibration plots of observed vs. expected waitlist mortality rates according to decile of expected rate at 30 days.

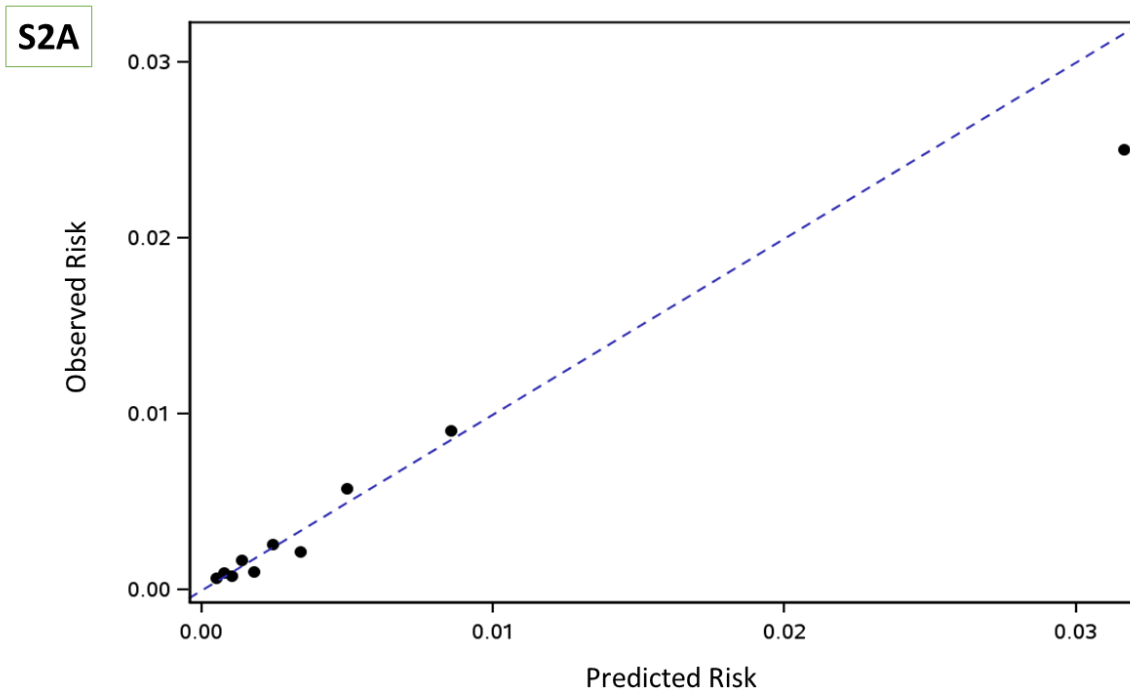

**Supplemental Figure S2b.** Calibration plots of observed vs. expected waitlist mortality rates according to decile of expected rate at 90 days.

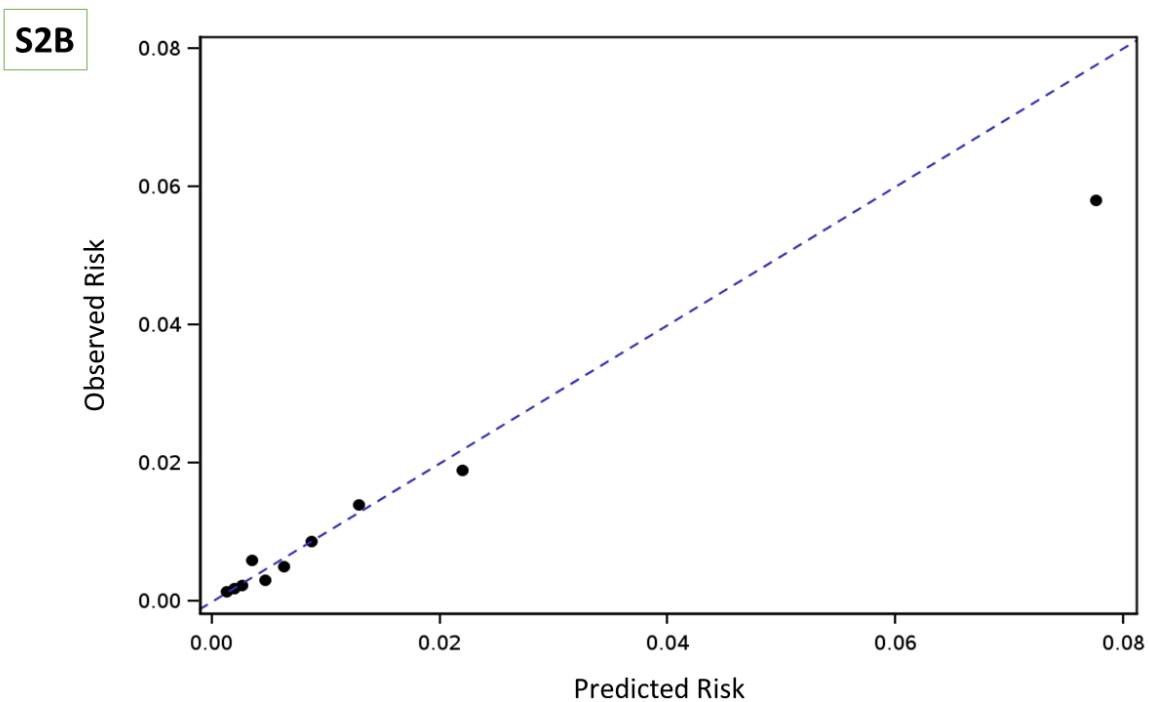

**Supplemental Figure S3a.** Observed vs. expected waitlist deaths by type of cardiac surgery at 30 days.

Legend: The error bars indicate 95% confidence intervals and were obtained through 200 bootstraps.

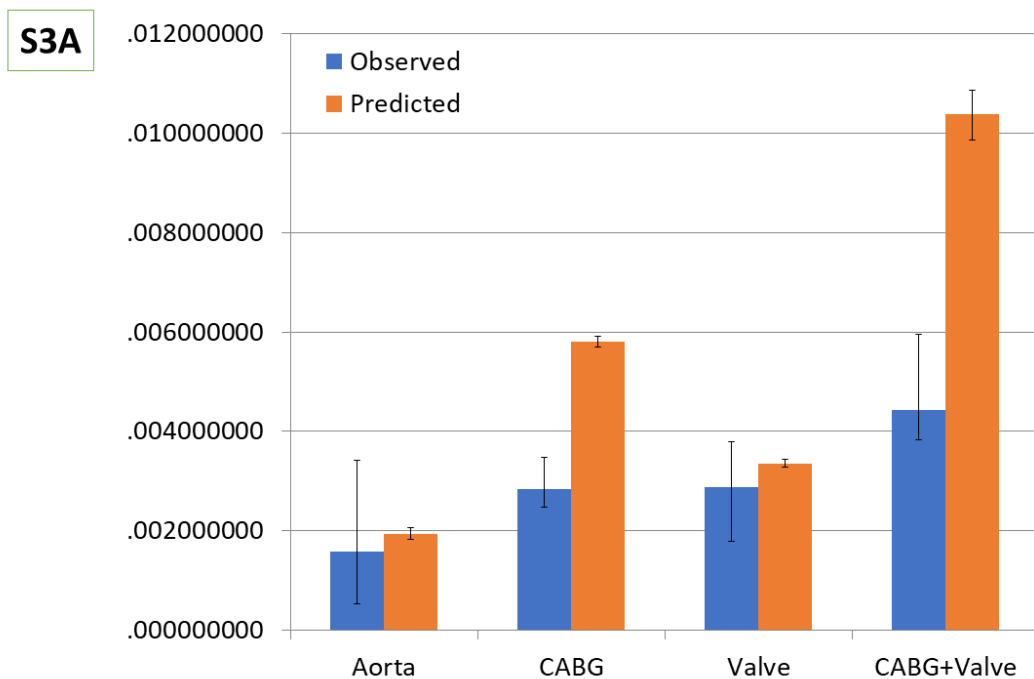

**Supplemental Figure S3b.** Observed vs. expected waitlist deaths by type of cardiac surgery at 90 days.

Legend: The error bars indicate 95% confidence intervals and were obtained through 200 bootstraps.

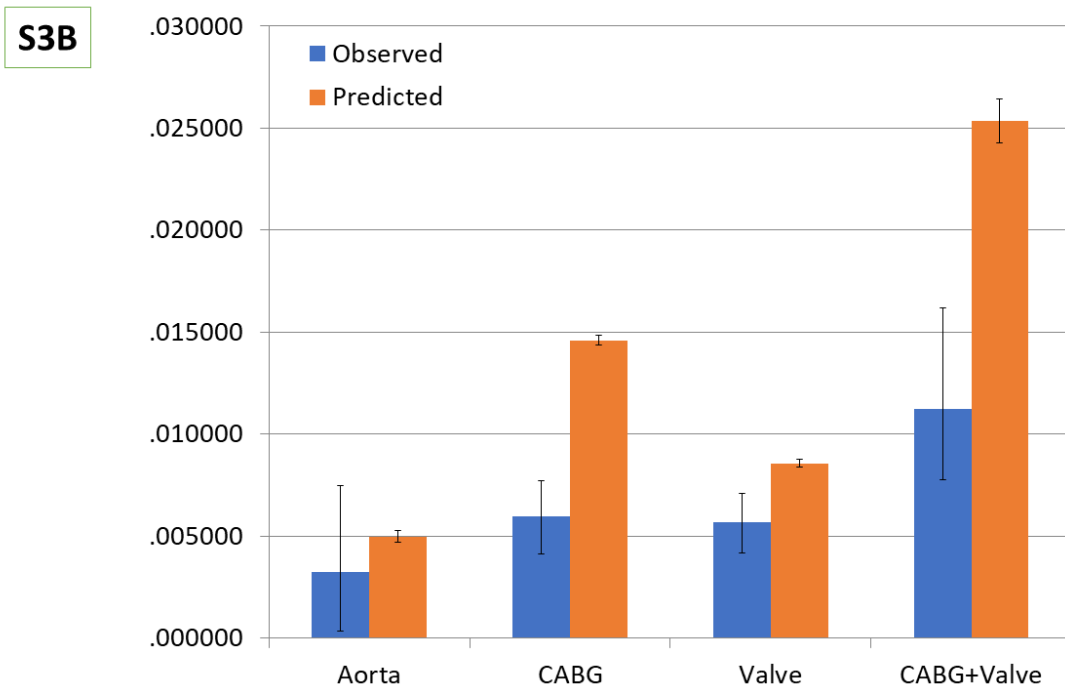

**Supplemental Table S1.** Multivariable predictors of waitlist death in the logistic model that imputed unknown operative priority.

| Variable                           | Model $\beta$ -Coefficient | Wald Chi-Square | P-value |
|------------------------------------|----------------------------|-----------------|---------|
| <b>Demographics</b>                |                            |                 |         |
| Age, yr                            | 0.0309                     | 24.2855         | <.0001  |
| Female sex                         | 0.0421                     | 0.0932          | 0.7602  |
| <b>Comorbidities</b>               |                            |                 |         |
| CCS classification                 |                            |                 |         |
| 0                                  | NA                         | NA              | NA      |
| 1                                  | -0.0688                    | 0.0877          | 0.7671  |
| 2                                  | -0.0660                    | 0.0887          | 0.7659  |
| 3                                  | -0.1050                    | 0.2008          | 0.6541  |
| 4                                  | 0.4066                     | 1.5561          | 0.2122  |
| Low-risk ACS                       | -0.2022                    | 0.6820          | 0.4089  |
| Intermediate-risk ACS              | 0.0600                     | 0.0663          | 0.7968  |
| High-risk ACS                      | 0.6361                     | 5.5885          | 0.0181  |
| LM or LM equivalent disease        | 0.2378                     | 2.3020          | 0.1292  |
| Left ventricular ejection fraction |                            |                 |         |
| $\geq 50\%$                        | NA                         | NA              | NA      |
| 35-49%                             | 0.7009                     | 21.4972         | <.0001  |
| 20-35%                             | 0.9267                     | 24.5732         | <.0001  |
| < 20%                              | 1.0397                     | 9.2154          | 0.0024  |
| Heart failure                      | 0.5625                     | 15.4619         | <.0001  |
| Atrial fibrillation                | -0.5342                    | 11.0024         | 0.0009  |
| Dialysis                           | 1.3167                     | 47.0915         | <.0001  |
| Psychosis                          | 1.6746                     | 8.0561          | 0.0045  |
| <b>Operative characteristics</b>   |                            |                 |         |
| Surgery type                       |                            |                 |         |
| CABG                               | NA                         | NA              | NA      |
| Valve                              | 0.9931                     | 22.7598         | <.0001  |
| CABG + Valve                       | 1.0354                     | 34.4080         | <.0001  |
| Thoracic Aorta                     | 0.7872                     | 3.5428          | 0.0598  |

**Abbreviations:** OR = odds ratio; CI = confidence interval; CCS = Canadian Cardiovascular Society; ACS = acute coronary syndrome; LM = left main coronary artery; CABG = coronary artery bypass grafting

**Supplemental Table S2.** Multivariable predictors of waitlist death in the time-to-event model.

| Variable                           | Model $\beta$ -Coefficient | HR (95% CI)       | P-value |
|------------------------------------|----------------------------|-------------------|---------|
| <b>Demographics</b>                |                            |                   |         |
| Age, yr                            | 0.031                      | 1.03 (1.02-1.04)  | <.0001  |
| Female sex                         | 0.051                      | 1.05 (0.8-1.38)   | 0.71    |
| <b>Comorbidities</b>               |                            |                   |         |
| CCS classification                 |                            |                   |         |
| 0                                  | NA                         | Reference         | NA      |
| 1                                  | -0.1267                    | 0.88 (0.56-1.39)  | 0.5865  |
| 2                                  | -0.0867                    | 0.92 (0.59-1.42)  | 0.696   |
| 3                                  | 0.0112                     | 1.01 (0.64-1.6)   | 0.9619  |
| 4                                  | 1.0332                     | 2.81 (1.46-5.4)   | 0.002   |
| Low-risk ACS                       | 0.8134                     | 2.26 (1.31-3.89)  | 0.0034  |
| Intermediate-risk ACS              | 1.0746                     | 2.93 (1.68-5.1)   | 0.0001  |
| High-risk ACS                      | 1.4399                     | 4.22 (1.89-9.42)  | 0.0004  |
| LM or LM equivalent disease        | 0.3967                     | 1.49 (1.09-2.03)  | 0.013   |
| Left ventricular ejection fraction |                            |                   |         |
| $\geq 50\%$                        | NA                         | Reference         | NA      |
| 35-49%                             | 0.6889                     | 1.99 (1.47-2.69)  | <.0001  |
| 20-35%                             | 0.9002                     | 2.46 (1.69-3.58)  | <.0001  |
| < 20%                              | 1.0494                     | 2.86 (1.43-5.69)  | 0.0029  |
| Heart failure                      | 0.5334                     | 1.7 (1.3-2.24)    | 0.0001  |
| Aortic stenosis                    | 0.4514                     | 1.57 (1.11-2.23)  | 0.0117  |
| Dialysis                           | 1.3329                     | 3.79 (2.61-5.51)  | <.0001  |
| Psychosis                          | 1.6378                     | 5.14 (1.64-16.15) | 0.005   |
| Recent MI                          | 0.6842                     | 1.98 (1.35-2.91)  | 0.0005  |
| <b>Operative characteristics</b>   |                            |                   |         |
| Surgery type                       |                            |                   |         |
| CABG                               | NA                         | Reference         | NA      |

|                    |         |                  |        |
|--------------------|---------|------------------|--------|
| Valve              | 0.2065  | 1.23 (0.73-2.06) | 0.4332 |
| CABG + Valve       | 0.2908  | 1.34 (0.84-2.14) | 0.2246 |
| Thoracic Aorta     | -0.3909 | 0.68 (0.27-1.68) | 0.3998 |
| Operative priority |         |                  |        |
| Unknown            | 0.9869  | 2.68 (1.72-4.18) | <.0001 |
| Emergent           | 0.8304  | 2.29 (0.98-5.37) | 0.0557 |
| Urgent             | 0.1368  | 1.15 (0.76-1.73) | 0.5148 |
| Semi-urgent        | 0.091   | 1.1 (0.71-1.69)  | 0.6819 |
| Elective           | NA      | Reference        | NA     |

---

**Abbreviations:** HR = hazard ratio; CI = confidence interval; CCS = Canadian Cardiovascular Society; ACS = acute coronary syndrome; LM = left main coronary artery; COPD = chronic obstructive pulmonary disease; CABG = coronary artery bypass grafting



**Supplemental Table S3.** Variables, their definitions and associated diagnostic codes.

| Variable                           | Data Source | Codes                                                                                                                                                                                                                                               |
|------------------------------------|-------------|-----------------------------------------------------------------------------------------------------------------------------------------------------------------------------------------------------------------------------------------------------|
| Age                                | RPDB        | bdate                                                                                                                                                                                                                                               |
| Sex                                | RPDB        | sex                                                                                                                                                                                                                                                 |
| Rurality                           | RPDB        | rural                                                                                                                                                                                                                                               |
| Adherence to recommended wait time | CCN         | real wait time is computed as the time between acceptance and removal, if real wait time<=recommended wait then adhere=1, else 0                                                                                                                    |
| Type of surgery                    | CCN         | Aorta: WaitTimeProcedure_wtlstentry="W.CAR.SURG.AO", CABG: WaitTimeProcedure_wtlstentry="W.CAR.SURG.CABG", CABG+Valve: WaitTimeProcedure_wtlstentry="W.CAR.SURG.CABGV", Valve: WaitTimeProcedure_wtlstentry in ("W.CAR.SURG.VO", "W.CAR.SURG.OTHV") |
| CCS                                | CCN         | Cath_CcsAcclsClass_cref                                                                                                                                                                                                                             |
| NYHA                               | CCN         | Cath_NYHeartAssociationCD                                                                                                                                                                                                                           |
| Operative priority                 | CCN         | PriorityLevelCD                                                                                                                                                                                                                                     |
| Recommend maximum wait time        | CCN         | CSCCalculatRecommendMaxWaitTime                                                                                                                                                                                                                     |
| Cardiogenic shock                  | CCN         | OffList_Cath_CardiogenicShockCD<br>Cath_CardiogenicShockCD                                                                                                                                                                                          |
| Left ventricle ejection fraction   | CCN         | Cath_LvFunctionCD, Surgery_Lvef                                                                                                                                                                                                                     |
| Endocarditis                       | CCN         | Cath_InfectiveEndocarditisCD, Cath_ActiveEndocarditisCD                                                                                                                                                                                             |
| Body mass index                    | CCN         | Cath_PatientHeight Cath_PatientWeight                                                                                                                                                                                                               |
| Glomerular filtration rate         | CCN         | Cath_CreatinineLevel                                                                                                                                                                                                                                |
| Atrial fibrillation                | DAD         | ICD10: I48,                                                                                                                                                                                                                                         |
|                                    | CCN         | Surgery_AtrialFibrillationCD                                                                                                                                                                                                                        |
| Alcohol abuse                      | DAD         | ICD10: 'F10','E52','G621','I426','K292','K700','K703','K709','T51','Z502','Z714','Z721'                                                                                                                                                             |
| Anemia                             | DAD         | ICD10: 'E222','E86','E87','D500'                                                                                                                                                                                                                    |
| Congestive heart failure           | CHF         | diagdate                                                                                                                                                                                                                                            |
|                                    | CCN         | Cath_HistoryOfChfCD                                                                                                                                                                                                                                 |
|                                    | DAD         | ICD10: 'I500','I501','I5090'                                                                                                                                                                                                                        |
| COPD                               | COPD        | diagdate                                                                                                                                                                                                                                            |
|                                    | CCN         | Cath_CopdCD                                                                                                                                                                                                                                         |
| Cerebrovascular disease            | DAD         | ICD10: I60", "I610", "I611", "I612", "I613", "I614", "I615", "I616", "I618", "I619", "I630", "I631", "I632", "I633", "I634", "I635", "I638", "I639", "H341", "I64", "G450", "G451", "G452", "G453", "G458", "G459", "H340"                          |
|                                    | CCN         | Cath_CvdCD                                                                                                                                                                                                                                          |
| Dementia                           | DEMENTIA    | diagdate                                                                                                                                                                                                                                            |
|                                    | DAD         | ICD10: 'F00','F01','F02','F03','F051','G30','G311'                                                                                                                                                                                                  |

|                             |                              |                                                                                                                                                                                                                                                                                                                                                                                                                                                                                                                                |
|-----------------------------|------------------------------|--------------------------------------------------------------------------------------------------------------------------------------------------------------------------------------------------------------------------------------------------------------------------------------------------------------------------------------------------------------------------------------------------------------------------------------------------------------------------------------------------------------------------------|
| Depression                  | DAD                          | ICD10:<br>'F204','F313','F314','F315','F32','F33','F341','F412','F432'                                                                                                                                                                                                                                                                                                                                                                                                                                                         |
| Diabetes                    | ODD                          | diagdate                                                                                                                                                                                                                                                                                                                                                                                                                                                                                                                       |
|                             | CCN                          | Cath_DiabetesCD                                                                                                                                                                                                                                                                                                                                                                                                                                                                                                                |
|                             | DAD                          | ICD10:<br>'E100','E101','E109','E110','E111','E119','E120','E121','E129','E130','E131','E139','E140','E141','E149','E102','E103','E104','E105','E106','E107','E108','E112','E113','E114','E115','E116','E117','E118','E122','E123','E124','E125','E126','E127','E128','E132','E133','E134','E135','E136','E137','E138','E142','E143','E144','E145','E146','E147','E148'                                                                                                                                                        |
| DAD, NACRS                  | CCI: "1PZ21HQBR","1PZ21HPD4" |                                                                                                                                                                                                                                                                                                                                                                                                                                                                                                                                |
| Dialysis                    | CCN                          | Cath_DialysisCD                                                                                                                                                                                                                                                                                                                                                                                                                                                                                                                |
|                             | OHIP                         | feecode: "R850", "R849", "G323", "G326", "G330", "G331", "G332", "G333", "G860", "G861", "G862", "G863", "G864", "G865", "G866", "G325"                                                                                                                                                                                                                                                                                                                                                                                        |
|                             | DAD, NACRS                   | CCI: "1PZ21HQBR","1PZ21HPD4"                                                                                                                                                                                                                                                                                                                                                                                                                                                                                                   |
| HTN                         | HYPERS                       | diagdate                                                                                                                                                                                                                                                                                                                                                                                                                                                                                                                       |
|                             | CCN                          | Cath_HypertensionCD                                                                                                                                                                                                                                                                                                                                                                                                                                                                                                            |
|                             | DAD                          | ICD10: 'I11','I12','I13','I15','I1-'                                                                                                                                                                                                                                                                                                                                                                                                                                                                                           |
| Dyslipidemia                | CCN                          | Cath_HyperlipidemiaCD                                                                                                                                                                                                                                                                                                                                                                                                                                                                                                          |
| Recent MI                   | CCN                          | Cath_RecentMiCD="Y"                                                                                                                                                                                                                                                                                                                                                                                                                                                                                                            |
| Peripheral vascular disease | DAD                          | ICD10: 'I70', 'I71', 'I731', 'I738', 'I739', 'I771', 'I790', 'I792', 'K551', 'K558', 'K559', 'Z958', 'Z959'                                                                                                                                                                                                                                                                                                                                                                                                                    |
|                             | CCN                          | Cath_PvdCD                                                                                                                                                                                                                                                                                                                                                                                                                                                                                                                     |
| Primary Cancer              | DAD                          | ICD10: 'C00','C00','C01','C02','C03','C04','C05','C06','C07','C08','C09','C10','C11','C12','C13','C14','C15','C16','C17','C18','C19','C20','C21','C22','C23','C24','C25','C26','C30','C31','C32','C33','C34','C37','C38','C39','C40','C41','C43','C45','C46','C47','C48','C49','C50','C51','C52','C53','C54','C55','C56','C57','C58','C60','C61','C62','C63','C64','C65','C66','C67','C68','C69','C70','C71','C72','C73','C74','C75','C76','C81','C82','C83','C84','C85','C88','C90','C91','C92','C93','C94','C95','C97','C96' |
| Psychosis                   | DAD                          | ICD10:<br>'F20','F22','F23','F24','F25','F28','F29','F302','F312','F315'                                                                                                                                                                                                                                                                                                                                                                                                                                                       |
| Liver disease               | DAD                          | ICD10:<br>'B18','I85','I864','I982','K70','K711','K713','K714','K715','K717','K72','K73','K74','K760','K762','K763','K764','K765','K766','K767','K768','K769','Z944'                                                                                                                                                                                                                                                                                                                                                           |
| Redo sternotomy             | CCN                          | Cath_PreviousCabgProcedureCD, Surgery_PriorSternotomyCD                                                                                                                                                                                                                                                                                                                                                                                                                                                                        |
| Metastatic cancer           | DAD                          | ICD10: 'C77','C78','C79','C80'                                                                                                                                                                                                                                                                                                                                                                                                                                                                                                 |
| LM_comb                     | CCN                          | proximalLAD and Circumflex disease (native or graft), or left main disease                                                                                                                                                                                                                                                                                                                                                                                                                                                     |
| Mitral valve regurgitation  | CCN                          | ReferralMitralRegurgitationIND="Y"                                                                                                                                                                                                                                                                                                                                                                                                                                                                                             |
| Aortic valve regurgitation  | CCN                          | ReferralAorticRegurgitationIND="Y"                                                                                                                                                                                                                                                                                                                                                                                                                                                                                             |
| Aortic valve stenosis       | CCN                          | ReferralAorticStenosisIND="Y" or ReferralPrimaryReasonCD="S" or ReferralSecondaryReasonCD="S"                                                                                                                                                                                                                                                                                                                                                                                                                                  |
| Smoking                     | CCN                          | Cath_HistoryOfSmokingCD                                                                                                                                                                                                                                                                                                                                                                                                                                                                                                        |

Appendix 1, as supplied by the authors. Appendix to: Sun LY, Wijeyesundera HC, Lee DS, et al. Derivation and validation of a clinical risk score to predict death while awaiting cardiac surgery in Ontario, Canada: a population-based study. *CMAJ Open* 2022. DOI:10.9778/cmajo.20210031. Copyright © 2022 The Author(s) or their employer(s). To receive this resource in an accessible format, please contact us at cmajgroup.cmajca

|                                 |          |                              |
|---------------------------------|----------|------------------------------|
| Teaching vs. community hospital | CCN/INST | AcceptanceSiteNumber(aminst) |
| Previous PCI                    | CCN      | Cath_PreviousPciCD           |
|                                 | OHIP     | feecode: "G298"              |

RPDB = Registered Persons Database; CCN= CorHealth Ontario clinical registry; DAD = Discharge Abstract Database; COPD = Ontario COPD database (an ICES-derived cohort); HYPER = Ontario Hypertension database (an ICES-derived cohort); DEMENTIA = Ontario dementia database (an ICES-derived cohort); ODD = Ontario Diabetes Database (an ICES-derived cohort); OHIP = Ontario Health Insurance Plan; INST = Institutions database
